# Supplementary material
Source: publisher figshare collection journal article supplement (https://acs.figshare.com/ndownloader/files/7797088)
Supplement: Supplementary file 1 [file 7797088]

SUPPORTING INFORMATION

# Chiral Self-assembly of Nonplanar 10,10'-dibromo-9,9'-bianthryl Molecules on Ag(111)

*Yixian Shen<sup>1,2</sup>, Guo Tian<sup>1</sup>, Han Huang<sup>1,3\*</sup>, Yanwei He<sup>1</sup>, Qiliang Xie<sup>1</sup>, Yunhao Lu<sup>4</sup>,*

*Pingshan Wang<sup>2</sup>, Yongli Gao<sup>1,3,5</sup>*

<sup>1</sup> Hunan Key Laboratory of Super-microstructure and Ultrafast Process, College of Physics and Electronics, Central South University, Changsha 410083, P. R. China

<sup>2</sup> College of Chemistry and Chemical Engineering, Central South University,

Changsha 410083, Hunan, P. R. China

<sup>3</sup> State Key Laboratory of Powder Metallurgy, Central South University, Changsha 410083, P. R. China

<sup>4</sup> College of Materials Science and Engineering, Zhejiang University, Hangzhou

310027, P. R. China

<sup>5</sup> Department of Physics and Astronomy, University of Rochester, Rochester, NY

14627, USA

E-mail: [physhh@csu.edu.cn](mailto:physhh@csu.edu.cn)

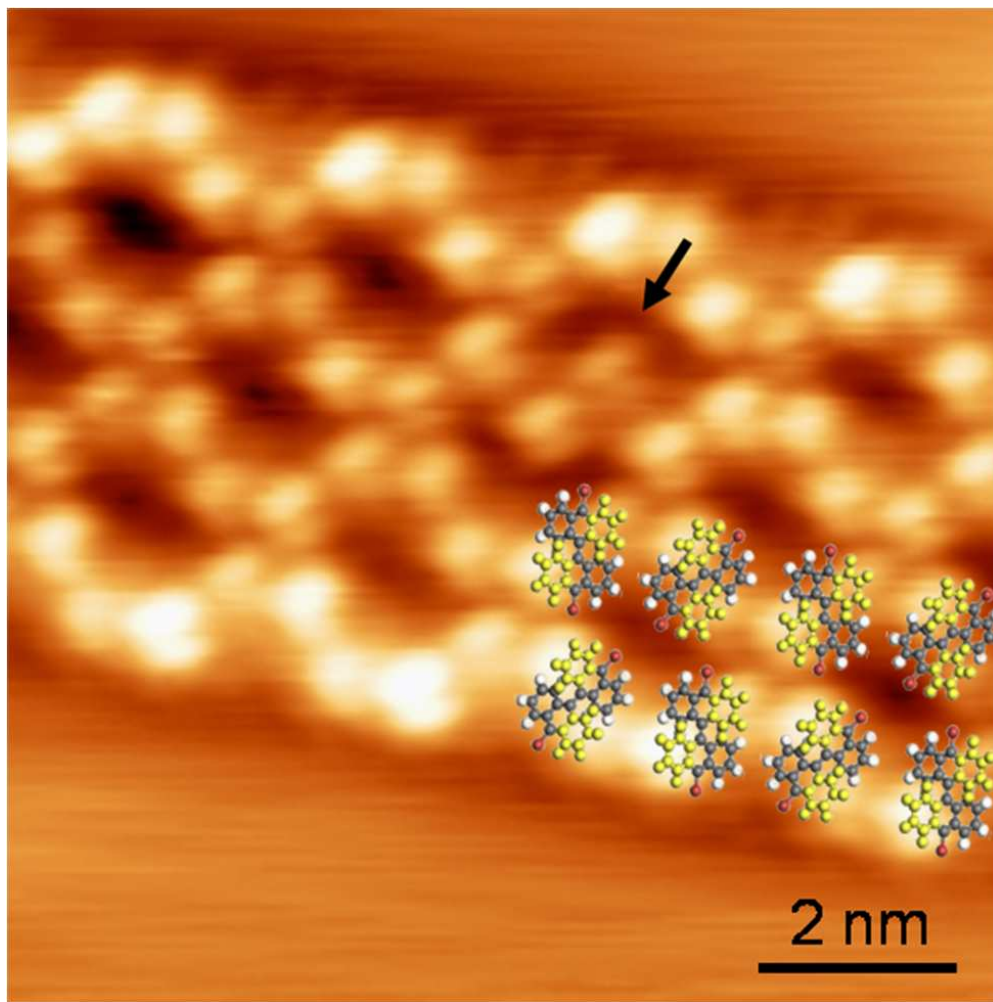

**Figure S1.** Enlarged image of the inset in Fig 2b. The arrow points out a defect assembly. The overlaid model shows a tentative molecular arrangement. ( $V_{\text{tip}} = -0.6\text{V}$ )

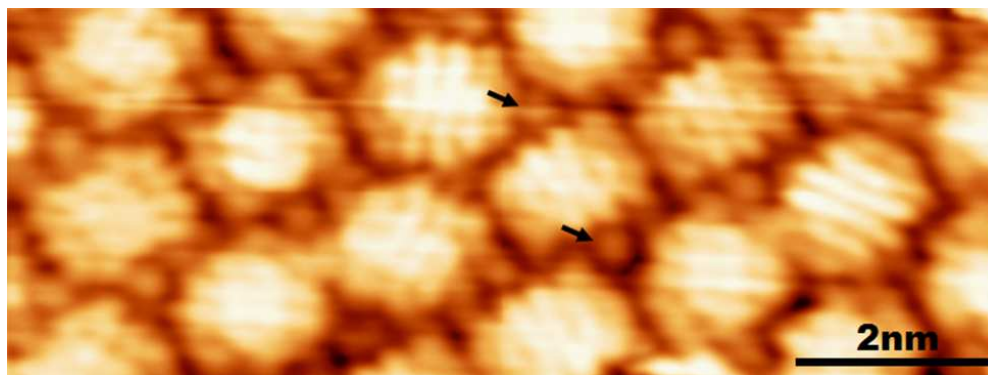

**Figure S2.** STM image of nanographene units produced after annealing the sample to 450K ( $V_{\text{tip}}=0.01\text{V}$ ). The protrusions (pointed out by black arrows) beside the nanographene units are considered to be the detached Br atoms.<sup>1,2</sup>

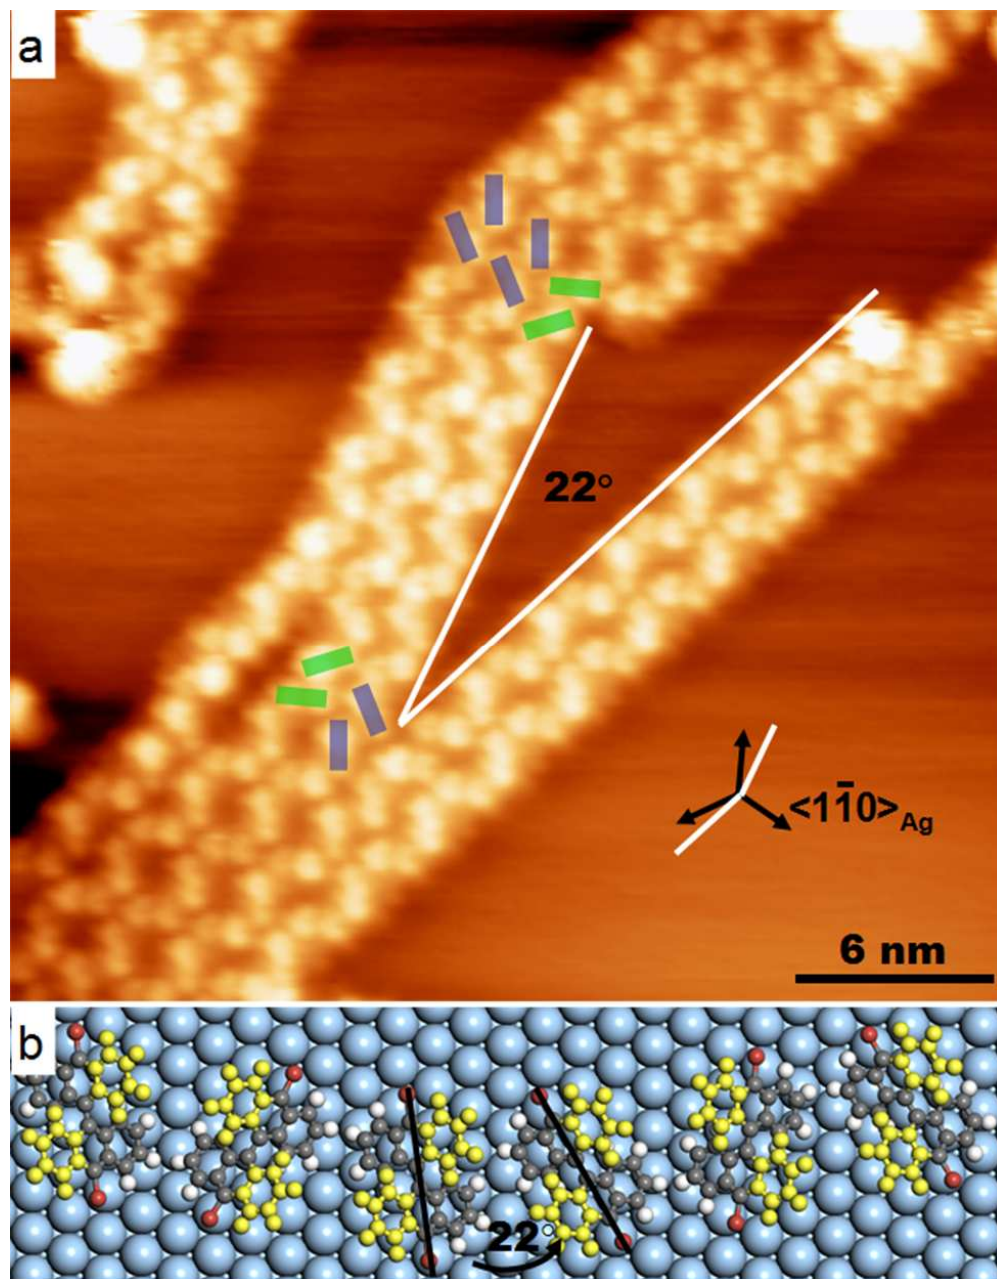

**Figure S3.** (a) STM image showing the deviation of DBBA islands ( $V_{\text{tip}}=1.2\text{V}$ ). Defects of adsorbing two homochiral molecules back to back are marked with colored rods. Such defects are considered to cause a deviation of  $22^\circ$  between domains and the reversion of domain chirality. (b) Tentative model of the deviation. The angle between the C-Br bonds of the homochiral molecules at the corner is  $22^\circ$ .



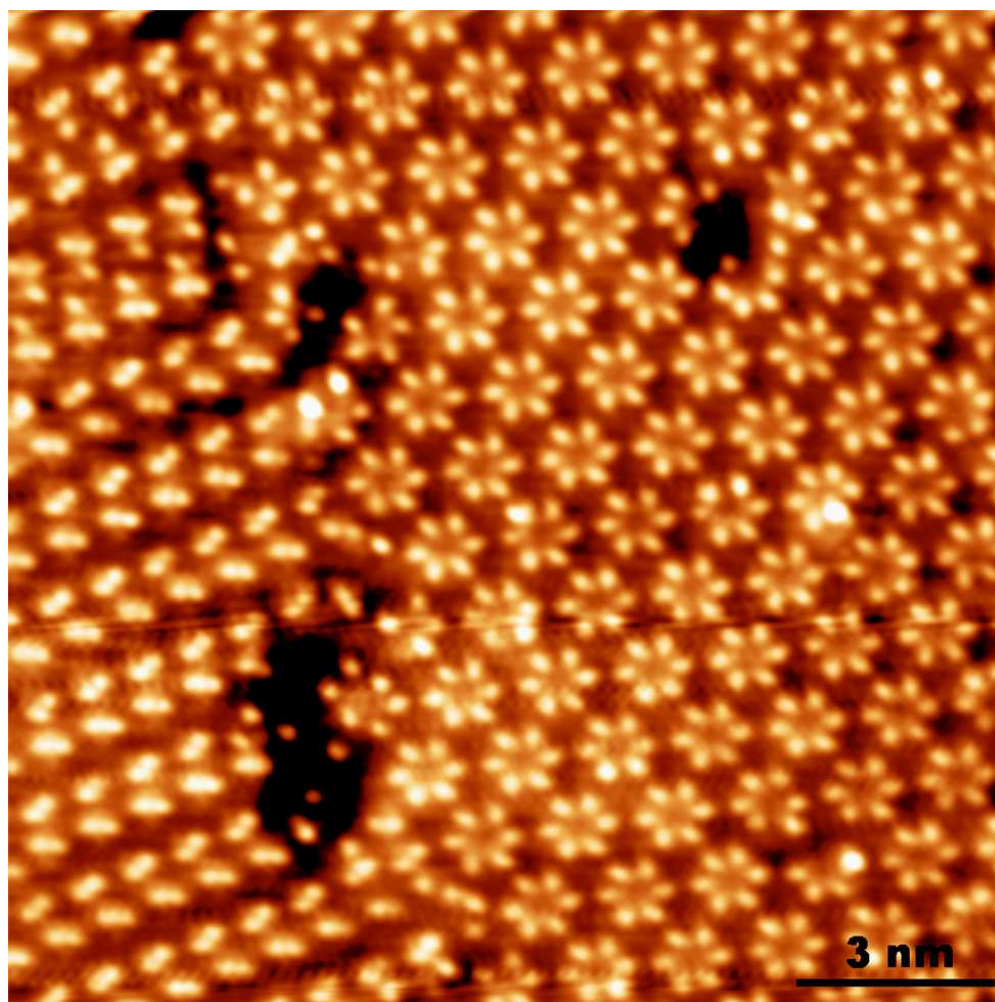

**Figure S4.** Enlarged image of the inset in Figure 3. ( $V_{\text{tip}} = -2.0\text{V}$ )

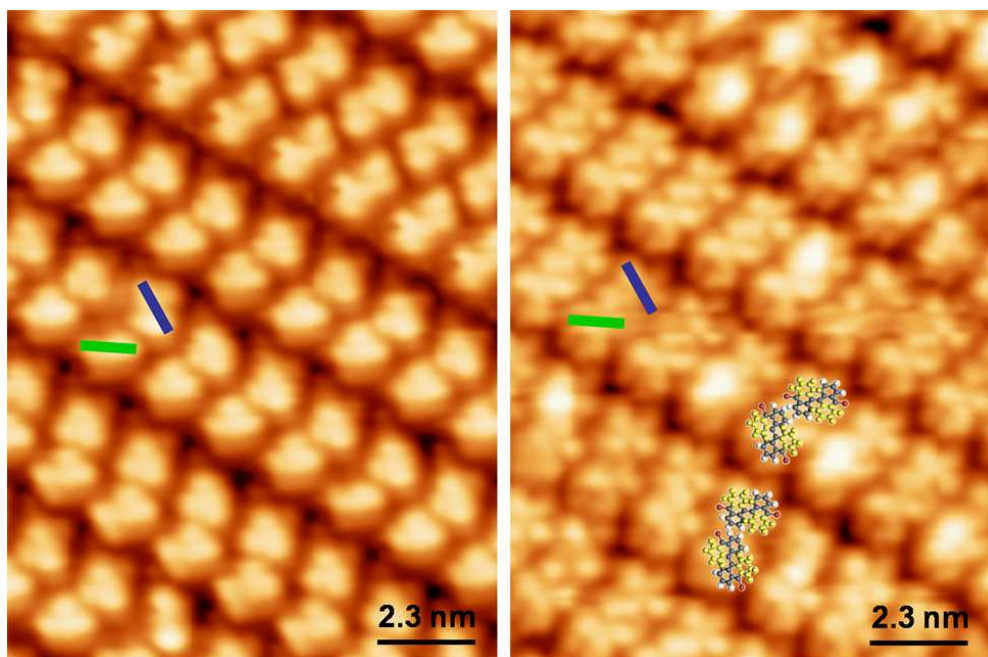

**Figure S5.** Enlarged images of Fig 4b (left,  $V_{\text{tip}} = 0.5\text{V}$ ) and 4c (right,  $V_{\text{tip}} = -2.5\text{V}$ ).

The colored rods show the up-tilted phenyl groups, where green for L-DBBA and blue for R-DBBA. The overlaid model shows a tentative molecular arrangement.

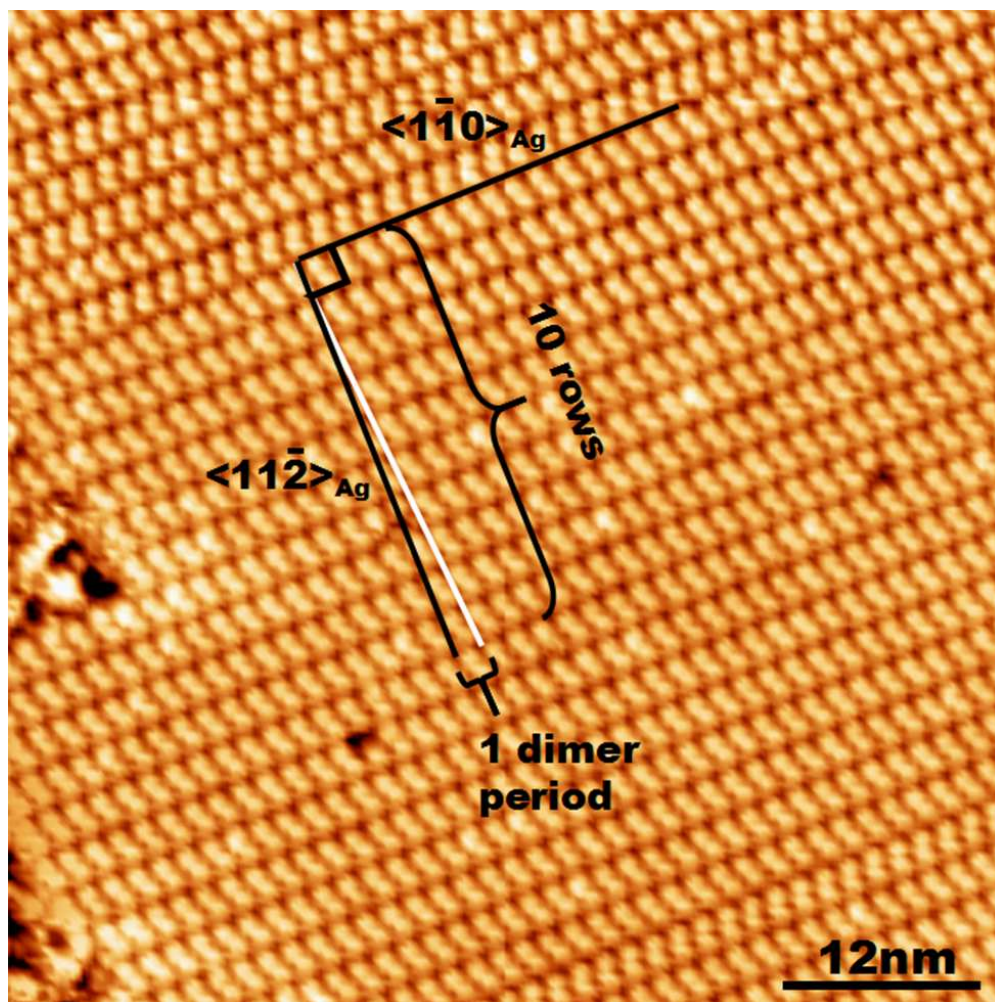

**Figure S6.** STM image showing the gliding between adjacent N-rows ( $V_{\text{tip}} = -2.0\text{V}$ ).

A dimer period is tentatively considered as 5 lattice constant of Ag(111), so the gliding distance between neighboring rows is 0.5 lattice constant.



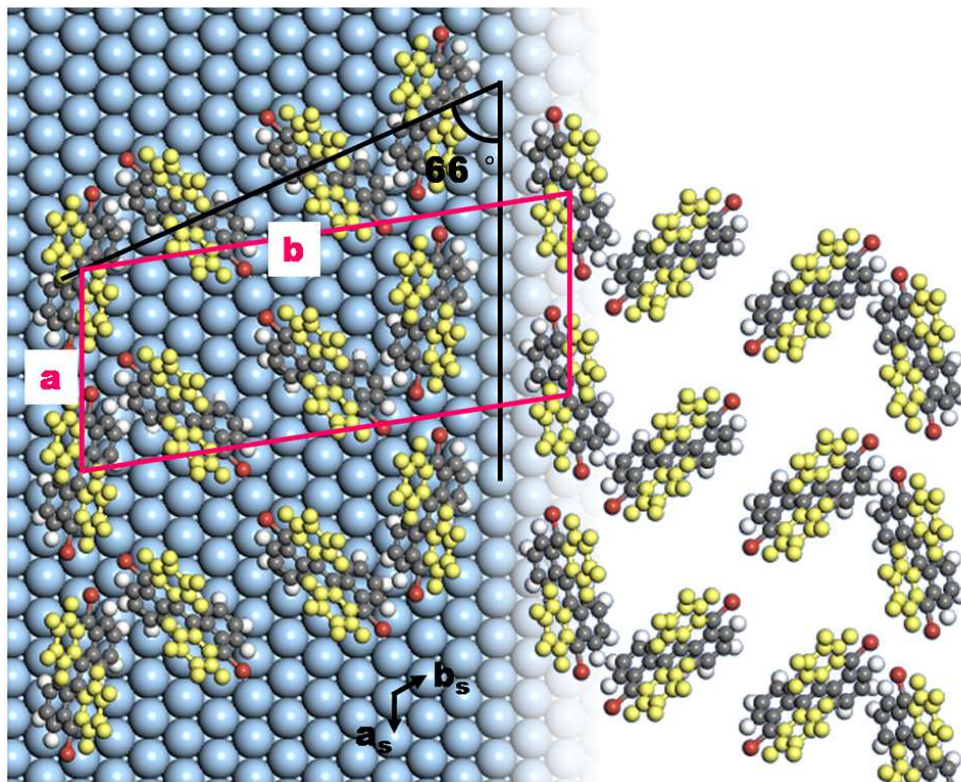

**Figure S7.** Tentative model of W-rows. DBBA molecules adsorb on the top site of surface atoms with C-Br axis deviate  $+10^\circ$  from  $\langle 1 \bar{1} 0 \rangle_{\text{Ag}}$ . The angle between tetramer axis and  $\langle 1 \bar{1} 0 \rangle_{\text{Ag}}$  is  $66^\circ$ . Unit cell matrix is  $\begin{pmatrix} a \\ b \end{pmatrix} = \begin{pmatrix} 5 & 0 \\ 5 & 14 \end{pmatrix} \begin{pmatrix} a_s \\ b_s \end{pmatrix}$ .



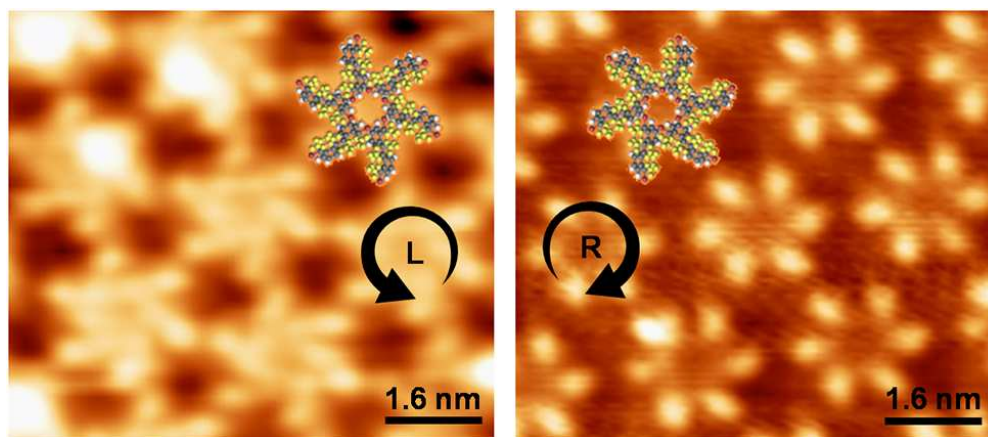

**Figure S8.** Enlarged images of the insets in Fig 5a (left,  $V_{\text{tip}} = -2.5\text{V}$ ) and 5b (right,  $V_{\text{tip}} = -2.0\text{V}$ ). The black arrows show the rotate direction of protrusion arrangement. The overlaid model shows a tentative molecular arrangement.

## REFERENCES

- (1) Huang, H.; Wei, D.; Sun, J.; Wong, S. L.; Feng, Y. P.; Neto, A. H.; Wee, A. T. S. Spatially resolved electronic structures of atomically precise armchair graphene nanoribbons. *Sci. rep.* **2012**, 2, 983.
- (2) Simonov, K. A.; Vinogradov, N. A.; Vinogradov, A. S.; Generalov, A. V.; Zagrebina, E. M.; Svirskiy, G. I.; Cafolla, A. A.; Carpy, T.; Cunniffe, J. P.; Taketsugu, T.; et al. From graphene nanoribbons on Cu(111) to nanographene on Cu(110): Critical role of substrate structure in the bottom-up fabrication strategy. *ACS Nano* **2015**, 9, 8997-9011.
